# Supplementary material for: Associations between childhood body size and seventeen adverse outcomes: analysis of 65,057 European women
Source: PubMed Central journal article supplement (PMC5717076; doi:10.1038/s41598-017-17258-5), 2017-12-05
Supplement: 41598_2017_17258_MOESM1_ESM.pdf [file 41598_2017_17258_MOESM1_ESM.pdf]

## **Associations between childhood body size and seventeen adverse outcomes: analysis of 65,057 European women**

Jingmei Li, assistant professor<sup>1,2,3\*</sup>, Mikael Eriksson, doctoral candidate<sup>3</sup>, Wei He, postdoctoral researcher<sup>3</sup>,  
Per Hall, professor<sup>3,4</sup>, Kamila Czene, professor<sup>3</sup>

<sup>1</sup> Genome Institute of Singapore, 60 Biopolis Street, Genome, #02-01, Singapore 138672, Singapore

<sup>2</sup> Department Of Surgery, Yong Loo Lin School of Medicine, National University of Singapore, Singapore

<sup>3</sup> Karolinska Institutet, Department of Medical Epidemiology and Biostatistics, Box 281, 171 77 Stockholm, Sweden

<sup>4</sup> Department of Oncology, Södersjukhuset, 118 84 Stockholm, Sweden

\*Correspondence to:

Jingmei Li, Genome Institute of Singapore, 60 Biopolis Street, Genome, #02-01, Singapore 138672, Singapore  
Tel: +65 6808 8312 Email: [lijm1@gis.a-star.edu.sg](mailto:lijm1@gis.a-star.edu.sg)

Keywords: childhood body size, somatotype, breast cancer, hypertension, diabetes

**Supplementary Table 1** Overlap between cases with breast cancer and cases with other negative health outcomes.

|                            | <b>Overlap, n (%)</b> |
|----------------------------|-----------------------|
| <i>Cancer outcomes</i>     |                       |
| Cervical cancer            | 9 (4.1)               |
| Uterine                    | 21 (8.1)              |
| Melanoma                   | 22 (4.0)              |
| Colon                      | 17 (7.2)              |
| <i>Non-cancer outcomes</i> |                       |
| Depression                 | 360 (3.7)             |
| Anorexia                   | 10 (2.0)              |
| Bulimia                    | 8 (2.5)               |
| PCOS                       | 4 (1.8)               |
| Ovarian cyst               | 132 (3.1)             |
| Stroke                     | 46 (6.7)              |
| Diabetes                   | 102 (5.7)             |
| Hypertension               | 693 (5.5)             |
| Hyperlipidemia             | 377 (5.5)             |
| Heart failure              | 31 (8.4)              |
| Myocardial infarction      | 46 (9.6)              |
| Angina pectoris            | 35 (6.1)              |

**Supplementary Table 2** Hazard ratios (HR) and corresponding 95% confidence intervals (CI) for the associations between childhood body size and different cancers in 62,324 breast cancer controls. Statistically significant associations (P<0.05) are presented in bold.

| Cancer outcome | Body size  | n   | Crude               | Adjusted for BMI    | n‡  | Subset,<br>adult BMI<25kg/m <sup>2</sup> ,<br>i.e. lean during adulthood | n§  | Subset,<br>adult BMI<25kg/m <sup>2</sup><br>and small/medium at 18,<br>i.e. lean during adolescence<br>and adulthood |
|----------------|------------|-----|---------------------|---------------------|-----|--------------------------------------------------------------------------|-----|----------------------------------------------------------------------------------------------------------------------|
|                |            |     | HR (95% CI)*        | HR (95% CI)†        |     | HR (95% CI)‡                                                             |     | HR (95% CI)§                                                                                                         |
| Cervical       | Small      | 125 | 1.00 (Reference)    | 1.00 (Reference)    | 75  | 1.00 (Reference)                                                         | 75  | 1.00 (Reference)                                                                                                     |
|                | Medium     | 66  | 0.79 (0.59 to 1.07) | 0.79 (0.59 to 1.07) | 30  | 0.74 (0.49 to 1.13)                                                      | 29  | 0.77 (0.50 to 1.18)                                                                                                  |
|                | Large      | 22  | 0.96 (0.61 to 1.52) | 0.96 (0.61 to 1.52) | 14  | 1.42 (0.80 to 2.52)                                                      | 8   | 1.15 (0.56 to 2.39)                                                                                                  |
|                | Trend      | 213 | 0.91 (0.74 to 1.12) | 0.91 (0.74 to 1.12) | 119 | 1.02 (0.77 to 1.35)                                                      | 112 | 0.92 (0.67 to 1.26)                                                                                                  |
|                | Continuous | 213 | 0.95 (0.86 to 1.05) | 0.95 (0.86 to 1.05) | 119 | 0.98 (0.85 to 1.13)                                                      | 112 | 0.92 (0.79 to 1.08)                                                                                                  |
| Uterine        | Small      | 141 | 1.00 (Reference)    | 1.00 (Reference)    | 66  | 1.00 (Reference)                                                         | 63  | 1.00 (Reference)                                                                                                     |
|                | Medium     | 78  | 0.87 (0.66 to 1.15) | 0.81 (0.61 to 1.07) | 26  | 0.73 (0.46 to 1.15)                                                      | 19  | 0.60 (0.36 to 1.00)                                                                                                  |
|                | Large      | 19  | 0.80 (0.50 to 1.29) | 0.70 (0.43 to 1.14) | 6   | 0.66 (0.28 to 1.51)                                                      | 3   | 0.49 (0.15 to 1.56)                                                                                                  |
|                | Trend      | 238 | 0.89 (0.73 to 1.08) | 0.83 (0.68 to 1.01) | 98  | 0.77 (0.55 to 1.08)                                                      | 85  | 0.64 (0.42 to 0.96)                                                                                                  |
|                | Continuous | 238 | 0.97 (0.88 to 1.07) | 0.94 (0.85 to 1.03) | 98  | 0.92 (0.79 to 1.08)                                                      | 85  | 0.85 (0.70 to 1.02)                                                                                                  |
| Melanoma       | Small      | 287 | 1.00 (Reference)    | 1.00 (Reference)    | 176 | 1.00 (Reference)                                                         | 172 | 1.00 (Reference)                                                                                                     |
|                | Medium     | 178 | 0.95 (0.79 to 1.14) | 0.95 (0.79 to 1.15) | 90  | 0.95 (0.74 to 1.22)                                                      | 81  | 0.94 (0.72 to 1.22)                                                                                                  |
|                | Large      | 64  | 1.25 (0.95 to 1.64) | 1.26 (0.96 to 1.66) | 23  | 0.99 (0.64 to 1.52)                                                      | 17  | 1.06 (0.64 to 1.75)                                                                                                  |
|                | Trend      | 529 | 1.06 (0.94 to 1.20) | 1.07 (0.94 to 1.21) | 289 | 0.97 (0.81 to 1.17)                                                      | 270 | 0.99 (0.81 to 1.20)                                                                                                  |
|                | Continuous | 529 | 1.02 (0.96 to 1.09) | 1.03 (0.96 to 1.09) | 289 | 0.98 (0.90 to 1.08)                                                      | 270 | 0.99 (0.90 to 1.10)                                                                                                  |
| Colon          | Small      | 119 | 1.00 (Reference)    | 1.00 (Reference)    | 65  | 1.00 (Reference)                                                         | 64  | 1.00 (Reference)                                                                                                     |
|                | Medium     | 76  | 1.00 (0.75 to 1.33) | 1.00 (0.75 to 1.34) | 36  | 1.03 (0.69 to 1.55)                                                      | 32  | 1.00 (0.66 to 1.53)                                                                                                  |
|                | Large      | 23  | 1.13 (0.72 to 1.76) | 1.13 (0.72 to 1.77) | 13  | 1.49 (0.82 to 2.70)                                                      | 8   | 1.34 (0.64 to 2.79)                                                                                                  |
|                | Trend      | 218 | 1.04 (0.85 to 1.27) | 1.04 (0.85 to 1.27) | 114 | 1.15 (0.88 to 1.52)                                                      | 104 | 1.09 (0.80 to 1.48)                                                                                                  |
|                | Continuous | 218 | 1.02 (0.93 to 1.13) | 1.02 (0.93 to 1.13) | 114 | 1.09 (0.95 to 1.25)                                                      | 104 | 1.08 (0.92 to 1.25)                                                                                                  |

\* Stratified by year of birth (1950, 1951-1960, 1961 and later).

† Stratified by year of birth and adjusted for body mass index (BMI, kg/m<sup>2</sup>, continuous) at questionnaire.

‡ Subset of women with adult BMI less than 25 kg/m<sup>2</sup>, stratified by year of birth.

§ Subset of women with adult BMI less than 25 kg/m and either small or medium body size at age 18, stratified by year of birth.

**Supplementary Table 3** Hazard ratios (HR) and corresponding 95% confidence intervals (CI) for the associations between childhood body size and self-reported common diseases in 62,324 breast cancer controls. Statistically significant associations (P<0.05) are presented in bold.

| Outcome               | Body size  | n    | Crude                      | Adjusted for BMI           | n‡   | Subset,<br>adult BMI<25kg/m <sup>2</sup> ,<br>i.e. lean during adulthood | n§   | Subset,<br>adult BMI<25kg/m <sup>2</sup><br>and small/medium at 18,<br>i.e. lean during<br>adolescence<br>and adulthood |
|-----------------------|------------|------|----------------------------|----------------------------|------|--------------------------------------------------------------------------|------|-------------------------------------------------------------------------------------------------------------------------|
|                       |            |      | HR (95% CI)*               | HR (95% CI)†               |      | HR (95% CI)‡                                                             |      | HR (95% CI)§                                                                                                            |
| Depression            | Small      | 5080 | 1.00 (Reference)           | 1.00 (Reference)           | 2876 | 1.00 (Reference)                                                         | 2808 | 1.00 (Reference)                                                                                                        |
|                       | Medium     | 3236 | <b>0.94 (0.90 to 0.98)</b> | <b>0.89 (0.85 to 0.93)</b> | 1426 | <b>0.91 (0.86 to 0.97)</b>                                               | 1292 | <b>0.91 (0.85 to 0.97)</b>                                                                                              |
|                       | Large      | 966  | 1.03 (0.96 to 1.11)        | 0.93 (0.87 to 1.00)        | 371  | 1.01 (0.90 to 1.12)                                                      | 254  | 1.00 (0.88 to 1.14)                                                                                                     |
|                       | Trend      | 9282 | 0.99 (0.96 to 1.02)        | <b>0.94 (0.91 to 0.97)</b> | 4673 | 0.96 (0.92 to 1.01)                                                      | 4354 | 0.96 (0.91 to 1.00)                                                                                                     |
|                       | Continuous | 9282 | 1.00 (0.98 to 1.01)        | 0.97 (0.96 to 0.99)        | 4673 | 0.98 (0.96 to 1.00)                                                      | 4354 | 0.98 (0.95 to 1.00)                                                                                                     |
| Anorexia              | Small      | 191  | 1.00 (Reference)           | 1.00 (Reference)           | 153  | 1.00 (Reference)                                                         | 147  | 1.00 (Reference)                                                                                                        |
|                       | Medium     | 223  | <b>1.72 (1.42 to 2.09)</b> | <b>2.19 (1.80 to 2.66)</b> | 191  | <b>2.34 (1.89 to 2.89)</b>                                               | 176  | <b>2.40 (1.93 to 2.99)</b>                                                                                              |
|                       | Large      | 74   | <b>2.08 (1.59 to 2.72)</b> | <b>3.11 (2.37 to 4.08)</b> | 55   | <b>2.87 (2.11 to 3.90)</b>                                               | 37   | <b>2.83 (1.97 to 4.06)</b>                                                                                              |
|                       | Trend      | 488  | <b>1.50 (1.32 to 1.69)</b> | <b>1.84 (1.63 to 2.08)</b> | 399  | <b>1.82 (1.59 to 2.08)</b>                                               | 360  | <b>1.88 (1.62 to 2.18)</b>                                                                                              |
|                       | Continuous | 488  | <b>1.24 (1.17 to 1.32)</b> | <b>1.39 (1.31 to 1.48)</b> | 399  | <b>1.38 (1.29 to 1.48)</b>                                               | 360  | <b>1.43 (1.33 to 1.53)</b>                                                                                              |
| Bulimia               | Small      | 119  | 1.00 (Reference)           | 1.00 (Reference)           | 87   | 1.00 (Reference)                                                         | 77   | 1.00 (Reference)                                                                                                        |
|                       | Medium     | 149  | <b>1.81 (1.42 to 2.31)</b> | <b>1.90 (1.49 to 2.42)</b> | 98   | <b>2.09 (1.56 to 2.78)</b>                                               | 81   | <b>2.10 (1.54 to 2.87)</b>                                                                                              |
|                       | Large      | 42   | <b>1.88 (1.32 to 2.67)</b> | <b>2.04 (1.42 to 2.91)</b> | 21   | <b>1.95 (1.21 to 3.14)</b>                                               | 16   | <b>2.39 (1.40 to 4.10)</b>                                                                                              |
|                       | Trend      | 310  | <b>1.46 (1.25 to 1.71)</b> | <b>1.52 (1.30 to 1.78)</b> | 206  | <b>1.58 (1.30 to 1.91)</b>                                               | 174  | <b>1.72 (1.39 to 2.14)</b>                                                                                              |
|                       | Continuous | 310  | <b>1.24 (1.15 to 1.33)</b> | <b>1.27 (1.17 to 1.37)</b> | 206  | <b>1.31 (1.19 to 1.44)</b>                                               | 174  | <b>1.38 (1.24 to 1.53)</b>                                                                                              |
| PCOS                  | Small      | 100  | 1.00 (Reference)           | 1.00 (Reference)           | 59   | 1.00 (Reference)                                                         | 57   | 1.00 (Reference)                                                                                                        |
|                       | Medium     | 81   | 1.15 (0.86 to 1.55)        | 0.99 (0.74 to 1.34)        | 33   | 1.03 (0.67 to 1.58)                                                      | 27   | 0.94 (0.60 to 1.49)                                                                                                     |
|                       | Large      | 32   | <b>1.71 (1.15 to 2.55)</b> | 1.27 (0.84 to 1.92)        | 12   | 1.70 (0.91 to 3.16)                                                      | 10   | <b>2.09 (1.07 to 4.09)</b>                                                                                              |
|                       | Trend      | 213  | <b>1.27 (1.05 to 1.54)</b> | 1.09 (0.90 to 1.33)        | 104  | 1.21 (0.90 to 1.61)                                                      | 94   | 1.23 (0.89 to 1.70)                                                                                                     |
|                       | Continuous | 213  | <b>1.14 (1.03 to 1.25)</b> | 1.05 (0.95 to 1.16)        | 104  | 1.08 (0.93 to 1.26)                                                      | 94   | 1.09 (0.92 to 1.28)                                                                                                     |
| Ovarian cyst          | Small      | 2303 | 1.00 (Reference)           | 1.00 (Reference)           | 1335 | 1.00 (Reference)                                                         | 1308 | 1.00 (Reference)                                                                                                        |
|                       | Medium     | 1450 | 0.94 (0.88 to 1.00)        | <b>0.92 (0.86 to 0.99)</b> | 703  | 0.97 (0.89 to 1.07)                                                      | 641  | 0.98 (0.89 to 1.07)                                                                                                     |
|                       | Large      | 440  | 1.04 (0.94 to 1.15)        | 1.00 (0.91 to 1.11)        | 186  | 1.07 (0.92 to 1.25)                                                      | 139  | 1.17 (0.98 to 1.40)                                                                                                     |
|                       | Trend      | 4193 | 0.99 (0.95 to 1.04)        | 0.97 (0.93 to 1.02)        | 2224 | 1.01 (0.95 to 1.08)                                                      | 2088 | 1.03 (0.96 to 1.11)                                                                                                     |
|                       | Continuous | 4193 | 1.00 (0.98 to 1.02)        | 0.99 (0.97 to 1.01)        | 2224 | 1.00 (0.97 to 1.04)                                                      | 2088 | 1.01 (0.97 to 1.04)                                                                                                     |
| Diabetes              | Small      | 899  | 1.00 (Reference)           | 1.00 (Reference)           | 279  | 1.00 (Reference)                                                         | 274  | 1.00 (Reference)                                                                                                        |
|                       | Medium     | 590  | 1.01 (0.91 to 1.12)        | 0.85 (0.77 to 0.95)        | 135  | 0.89 (0.73 to 1.10)                                                      | 124  | 0.90 (0.73 to 1.11)                                                                                                     |
|                       | Large      | 214  | <b>1.35 (1.16 to 1.57)</b> | 0.98 (0.84 to 1.14)        | 34   | 0.91 (0.64 to 1.30)                                                      | 24   | 0.93 (0.62 to 1.42)                                                                                                     |
|                       | Trend      | 1703 | <b>1.11 (1.04 to 1.19)</b> | 0.95 (0.88 to 1.02)        | 448  | 0.93 (0.80 to 1.08)                                                      | 422  | 0.93 (0.79 to 1.10)                                                                                                     |
|                       | Continuous | 1703 | <b>1.04 (1.01 to 1.08)</b> | <b>0.95 (0.92 to 0.99)</b> | 448  | 0.95 (0.88 to 1.02)                                                      | 422  | 0.95 (0.88 to 1.03)                                                                                                     |
| Hyperlipidemia        | Small      | 3647 | 1.00 (Reference)           | 1.00 (Reference)           | 1728 | 1.00 (Reference)                                                         | 1698 | 1.00 (Reference)                                                                                                        |
|                       | Medium     | 2161 | <b>0.91 (0.86 to 0.96)</b> | <b>0.85 (0.81 to 0.90)</b> | 773  | <b>0.81 (0.75 to 0.89)</b>                                               | 712  | <b>0.82 (0.75 to 0.89)</b>                                                                                              |
|                       | Large      | 684  | 1.07 (0.98 to 1.16)        | 0.95 (0.88 to 1.03)        | 230  | 0.97 (0.85 to 1.12)                                                      | 167  | 1.03 (0.88 to 1.21)                                                                                                     |
|                       | Trend      | 6492 | 0.99 (0.95 to 1.03)        | <b>0.93 (0.90 to 0.97)</b> | 2731 | <b>0.91 (0.86 to 0.97)</b>                                               | 2577 | <b>0.92 (0.86 to 0.98)</b>                                                                                              |
|                       | Continuous | 6492 | 0.99 (0.97 to 1.01)        | <b>0.96 (0.94 to 0.98)</b> | 2731 | <b>0.95 (0.92 to 0.98)</b>                                               | 2577 | <b>0.95 (0.92 to 0.98)</b>                                                                                              |
| Stroke                | Small      | 391  | 1.00 (Reference)           | 1.00 (Reference)           | 178  | 1.00 (Reference)                                                         | 175  | 1.00 (Reference)                                                                                                        |
|                       | Medium     | 191  | <b>0.76 (0.64 to 0.90)</b> | <b>0.72 (0.60 to 0.85)</b> | 85   | 0.89 (0.68 to 1.15)                                                      | 78   | 0.89 (0.68 to 1.16)                                                                                                     |
|                       | Large      | 61   | 0.90 (0.69 to 1.18)        | 0.81 (0.62 to 1.06)        | 22   | 0.92 (0.59 to 1.43)                                                      | 13   | 0.78 (0.45 to 1.38)                                                                                                     |
|                       | Trend      | 643  | <b>0.87 (0.77 to 0.98)</b> | <b>0.82 (0.73 to 0.93)</b> | 285  | 0.93 (0.77 to 1.12)                                                      | 266  | 0.89 (0.72 to 1.09)                                                                                                     |
|                       | Continuous | 643  | <b>0.94 (0.88 to 0.99)</b> | <b>0.91 (0.86 to 0.97)</b> | 285  | 0.95 (0.87 to 1.04)                                                      | 266  | 0.93 (0.84 to 1.03)                                                                                                     |
| Heart failure         | Small      | 188  | 1.00 (Reference)           | 1.00 (Reference)           | 78   | 1.00 (Reference)                                                         | 71   | 1.00 (Reference)                                                                                                        |
|                       | Medium     | 119  | 1.00 (0.79 to 1.26)        | 0.90 (0.71 to 1.13)        | 39   | 0.93 (0.63 to 1.37)                                                      | 36   | 1.01 (0.68 to 1.51)                                                                                                     |
|                       | Large      | 30   | 0.94 (0.64 to 1.39)        | 0.78 (0.53 to 1.15)        | 5    | 0.47 (0.19 to 1.16)                                                      | 3    | 0.44 (0.14 to 1.41)                                                                                                     |
|                       | Trend      | 337  | 0.98 (0.83 to 1.15)        | 0.89 (0.75 to 1.05)        | 122  | 0.81 (0.60 to 1.09)                                                      | 110  | 0.86 (0.62 to 1.19)                                                                                                     |
|                       | Continuous | 337  | 1.01 (0.93 to 1.09)        | 0.95 (0.88 to 1.03)        | 122  | 0.92 (0.79 to 1.06)                                                      | 110  | 0.94 (0.80 to 1.10)                                                                                                     |
| Myocardial infarction | Small      | 252  | 1.00 (Reference)           | 1.00 (Reference)           | 93   | 1.00 (Reference)                                                         | 93   | 1.00 (Reference)                                                                                                        |
|                       | Medium     | 131  | 0.81 (0.65 to 1.00)        | <b>0.73 (0.59 to 0.90)</b> | 46   | 0.91 (0.64 to 1.30)                                                      | 39   | 0.83 (0.57 to 1.21)                                                                                                     |
|                       | Large      | 50   | 1.16 (0.85 to 1.57)        | 0.96 (0.70 to 1.30)        | 13   | 1.01 (0.57 to 1.81)                                                      | 8    | 0.89 (0.43 to 1.83)                                                                                                     |
|                       | Trend      | 433  | 0.98 (0.85 to 1.13)        | 0.89 (0.77 to 1.03)        | 152  | 0.97 (0.76 to 1.24)                                                      | 140  | 0.89 (0.67 to 1.18)                                                                                                     |

|                 |            |     |                     |                            |     |                            |     |                            |
|-----------------|------------|-----|---------------------|----------------------------|-----|----------------------------|-----|----------------------------|
|                 | Continuous | 433 | 0.98 (0.91 to 1.05) | 0.93 (0.87 to 1.00)        | 152 | 0.96 (0.85 to 1.09)        | 140 | 0.91 (0.79 to 1.05)        |
| Angina pectoris | Small      | 318 | 1.00 (Reference)    | 1.00 (Reference)           | 121 | 1.00 (Reference)           | 120 | 1.00 (Reference)           |
|                 | Medium     | 170 | 0.84 (0.70 to 1.01) | <b>0.76 (0.63 to 0.92)</b> | 53  | 0.81 (0.59 to 1.12)        | 46  | 0.76 (0.54 to 1.07)        |
|                 | Large      | 47  | 0.86 (0.63 to 1.17) | <b>0.72 (0.53 to 0.98)</b> | 7   | <b>0.42 (0.20 to 0.90)</b> | 3   | <b>0.26 (0.08 to 0.81)</b> |
|                 | Trend      | 535 | 0.89 (0.78 to 1.02) | <b>0.81 (0.71 to 0.93)</b> | 181 | <b>0.73 (0.57 to 0.94)</b> | 169 | <b>0.67 (0.50 to 0.89)</b> |
|                 | Continuous | 535 | 0.94 (0.88 to 1.00) | <b>0.90 (0.84 to 0.96)</b> | 181 | <b>0.85 (0.75 to 0.96)</b> | 169 | <b>0.81 (0.71 to 0.93)</b> |

\* Stratified by year of birth (1950, 1951-1960, 1961 and later).

† Stratified by year of birth and adjusted for body mass index (BMI, kg/m<sup>2</sup>, continuous) at questionnaire.

‡ Subset of women with adult BMI less than 25 kg/m<sup>2</sup>, stratified by year of birth.

§ Subset of women with adult BMI less than 25 kg/m and either small or medium body size at age 18, stratified by year of birth.
